# Supplementary material for: Environmental Factors Affecting Survival of Immature Ixodes scapularis and Implications for Geographical Distribution of Lyme Disease: The Climate/Behavior Hypothesis
Source: PLoS One. 2017 Jan 11;12(1):e0168723. doi: 10.1371/journal.pone.0168723 (PMC5226345; doi:10.1371/journal.pone.0168723)
Supplement: S6 Data — (CSV) [file pone.0168723.s006.csv]

		Dmax values
	cumulative mortality-South minus North
clutch	RH=75.8	RH=86.4	RH=95.9
21	0.711	0.108	-0.086
22	0.79	0.106	0
23	0.702	-0.094	0
27	0.69	0.299	0.069
28	0.494	-0.204	0.111
29	0.583	-0.613	0.021
30	0.791	0.109	0
32	0.809	0.163	0
34	0.432	0.361	-0.083
35	0.764	-0.193	-0.048
